# Supplementary material for: A Fe/Fe3O4/N-carbon composite with hierarchical porous structure and in situ formed N-doped graphene-like layers for high-performance lithium ion batteries
Source: Royal Society of Chemistry journal article supplement (doi:10.1039/c4dt03615h), 2015-01-01

# A Novel Fe/Fe<sub>3</sub>O<sub>4</sub>/N-carbon composite with hierarchical porous structure and in situ formed N-doped graphene-like layers for high-performance lithium ion batteries

Yao Li<sup>a</sup>, Qing Meng<sup>b</sup>, Shen-min Zhu<sup>\*a</sup>, Zeng-hui Sun<sup>a</sup>, Hao Yang<sup>a</sup>, Zhi-xin Chen<sup>b</sup>, Cheng-ling

Zhu<sup>a</sup>, Zai-ping Guo<sup>b</sup> and Di Zhang<sup>\*a</sup>

<sup>a</sup> State Key Laboratory of Metal Matrix Composites, Shanghai Jiao Tong University, Shanghai

200240, China. E-mail: smzhu@sjtu.edu.cn (S.M. Zhu); Tel: +86 21 3420 2584; Fax: +86 21 3420

2749.

<sup>b</sup> The Faculty of Engineering and Information Science, University of Wollongong, NSW 2522,

Australia

Figure S1. Raman spectra of RHC, Fe/Fe<sub>3</sub>O<sub>4</sub>/carbon and Fe/Fe<sub>3</sub>O<sub>4</sub>/N-carbon.

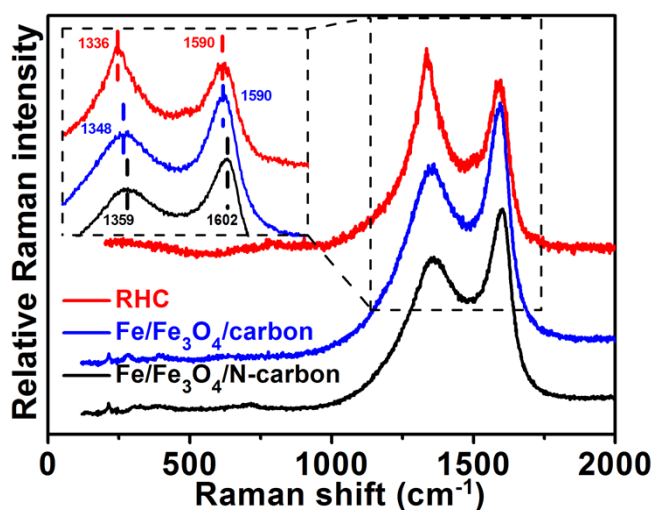

Figure S2. TGA curves of RHC, Fe/Fe<sub>3</sub>O<sub>4</sub>-carbon, Fe/Fe<sub>3</sub>O<sub>4</sub>/N-carbon and Fe/Fe<sub>3</sub>O<sub>4</sub>/N without carbon.

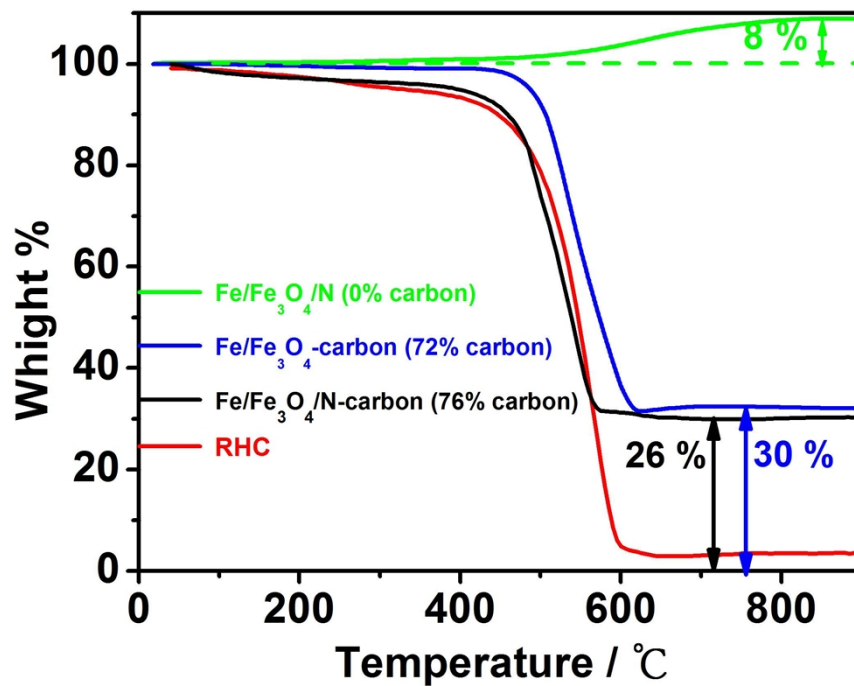

Figure S3. Galvanostatic charge–discharge curves of (a) Fe/Fe<sub>3</sub>O<sub>4</sub>/N-carbon (b) RHC and (c) Fe/Fe<sub>3</sub>O<sub>4</sub>/carbon in the voltage range 0.01-3.0 V (vs. Li) at a current of 50 mA g<sup>-1</sup>.

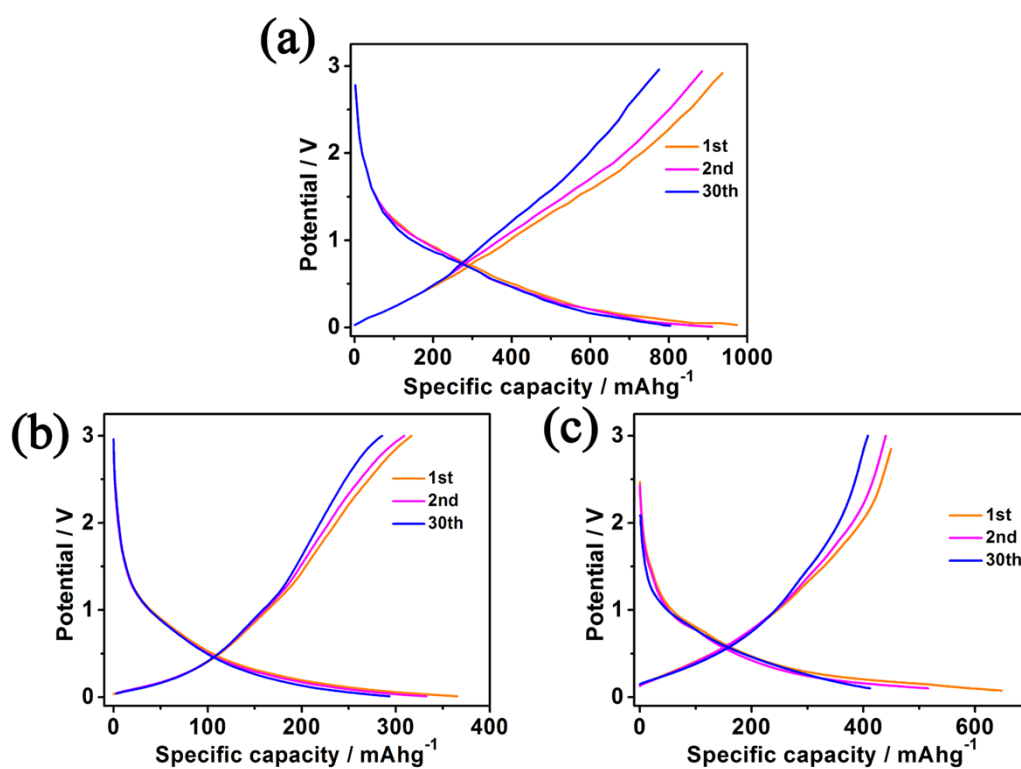

Figure S4. The equivalent circuit of Fe/Fe<sub>3</sub>O<sub>4</sub>/N-carbon, RHC and Fe/Fe<sub>3</sub>O<sub>4</sub>/carbon.

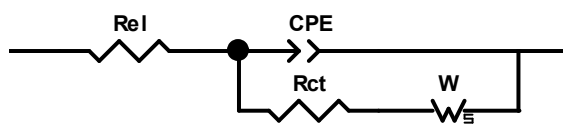

Figure S5. TEM images of Fe/Fe<sub>3</sub>O<sub>4</sub>/N-carbon composite after 100 discharge/charge cycles.

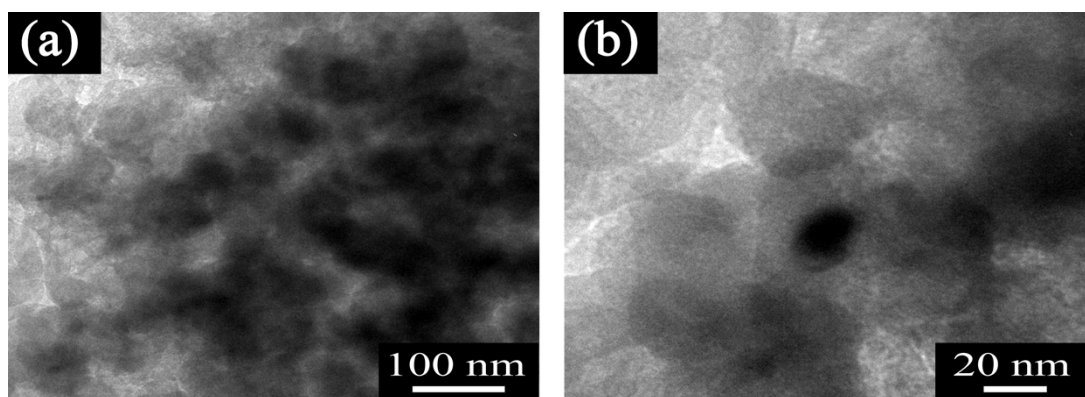

Supplement: c4dt03615h1.pdf [file c4dt03615h1.pdf]
